# Supplementary material
Source: PubMed Central journal article supplement (PMC5574253)

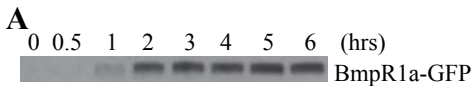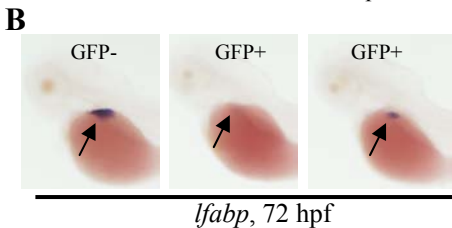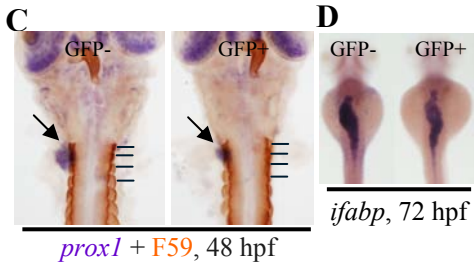

Supplement: NIHMS895173-supplement-Figure_S5.pdf [file NIHMS895173-supplement-Figure_S5.pdf]
